# Supplementary material for: Development of the Japanese version of the Council on Nutrition Appetite Questionnaire and its simplified versions, and evaluation of their reliability, validity, and reproducibility
Source: PubMed Central journal article supplement (PMC5608592; doi:10.1016/j.je.2016.11.002), 2017-02-03
Supplement: mmc1.pdf [file mmc1.pdf]

**eTable 1.** Council on Nutrition Appetite Questionnaire (CNAQ)

---

Administration Instructions: Ask the subject to complete the questionnaire by circling the correct answers and then tally the results based upon the following numerical scale: a=1, b=2, c=3, d=4, e=5. The sum of the scores for the individual items constitutes the CNAQ score. CNAQ score  $\leq 28$  indicates significant risk of at least 5% weight loss within six months.

---

- |                                                     |                                                |
|-----------------------------------------------------|------------------------------------------------|
| 1. My appetite is                                   | 5. Compared to when I was younger, food tastes |
| a. very poor                                        | a. much worse                                  |
| b. poor                                             | b. worse                                       |
| c. average                                          | c. just as good                                |
| d. good                                             | d. better                                      |
| e. very good                                        | e. much better                                 |
| 2. When I eat                                       | 6. Normally I eat                              |
| a. I feel full after eating only a few mouthfuls    | a. less than one meal a day                    |
| b. I feel full after eating about a third of a meal | b. one meal a day                              |
| c. I feel full after eating over half a meal        | c. two meals a day                             |
| d. I feel full after eating most of the meal        | d. three meals a day                           |
| e. I hardly ever feel full                          | e. more than three meals a day                 |
| 3. I feel hungry                                    | 7. I feel sick or nauseated when I eat         |
| a. rarely                                           | a. most times                                  |
| b. occasionally                                     | b. often                                       |
| c. some of the time                                 | c. sometimes                                   |
| d. most of the time                                 | d. rarely                                      |
| e. all of the time                                  | e. never                                       |
| 4. Food tastes                                      | 8. Most of the time my mood is                 |
| a. very bad                                         | a. very sad                                    |
| b. bad                                              | b. sad                                         |
| c. average                                          | c. neither sad nor happy                       |
| d. good                                             | d. happy                                       |
| e. very good                                        | e. very happy                                  |
-

eTable 2. 日本語版 CNAQ (CNAQ-J)

ここ1ヵ月間の食生活を思い出し、A~Hの質問に対し当てはまる番号の1つに○印をつけてください。

A. 食欲はありますか？

1. ほとんどない
2. あまりない
3. ふつう
4. ある
5. とてもある

E. 若いころと比べて、食事の味はどうですか？

1. とてもまずい
2. おいしくない
3. 変わらない
4. おいしい
5. とてもおいしい

B. 食事を、どのくらい食べると満腹感を感じますか？

1. 数口で満腹
2. 3分の1ほどで満腹
3. 半分ほどで満腹
4. ほとんど食べて満腹
5. 満腹になることはほとんどない

F. 食事は、1日何回食べますか？

1. 1日 1回未満
2. 1日 1回
3. 1日 2回
4. 1日 3回
5. 1日 4回以上

C. 空腹感がありますか？

1. めったに感じない
2. たまに感じる
3. 時々感じる
4. よく感じる
5. いつも感じる

G. 食事中に気分が悪くなったり、吐き気を感じることはありますか？

1. いつも感じる
2. よく感じる
3. 時々感じる
4. まれに感じる
5. まったく感じない

D. 食事の味はいかがですか？

1. とてもまずい
2. おいしくない
3. ふつう
4. おいしい
5. とてもおいしい

H. ふだん、どのような気持ちですか？

1. とても沈んでいる
2. 沈んでいる
3. 沈んでもなく、楽しくもない
4. 楽しい
5. とても楽しい

eTable 3. 日本語版 SNAQ (SNAQ-J)

ここ1ヵ月間の食生活を思い出し、A~Dの質問に対し当てはまる番号の1つに○印をつけてください。

A. 食欲はありますか？

1. ほとんどない
2. あまりない
3. ふつう
4. ある
5. とてもある

C. 食事の味はいかがですか？

1. とてもまずい
2. おいしくない
3. ふつう
4. おいしい
5. とてもおいしい

B. 食事を、どのくらい食べると満腹感を感じますか？

1. 数口で満腹
2. 3分の1ほどで満腹
3. 半分ほどで満腹
4. ほとんど食べて満腹
5. 満腹になることはほとんどない

D. 食事は、1日何回食べますか？

1. 1日 1回未満
2. 1日 1回
3. 1日 2回
4. 1日 3回
5. 1日 4回以上

eTable 4. 高齢者用日本語版 SNAQ (SNAQ-JE)

ここ1ヵ月間の食生活を思い出し、A~Dの質問に対し当てはまる番号の1つに○印をつけてください。

1. 食欲はありますか？

- 1. ほとんどない
- 2. あまりない
- 3. ふう
- 4. ある
- 5. とてもある

3 食事の味はいかがですか？

- 1. とてもまずい
- 2. おいしくない
- 3. ふう
- 4. おいしい
- 5. とてもおいしい

2. 食事を、どのくらい食べると満腹感を感じますか？

- 1. 数口で満腹
- 2. 3分の1ほどで満腹
- 3. 半分ほどで満腹
- 4. ほとんど食べて満腹
- 5. 満腹になることはほとんどない

4. ぶん、どのような気持ちですか？

- 1. とても沈んでいる
- 2. 沈んでいる
- 3. 沈んでもなく、楽しくもない
- 4. 楽しい
- 5. とても楽しい
